# Supplementary material
Source: Springer Nature journal article supplement (https://www.springermedizin.de/resource/supplementary/12906_2010_337_MOESM7_ESM.pdf/9519466)

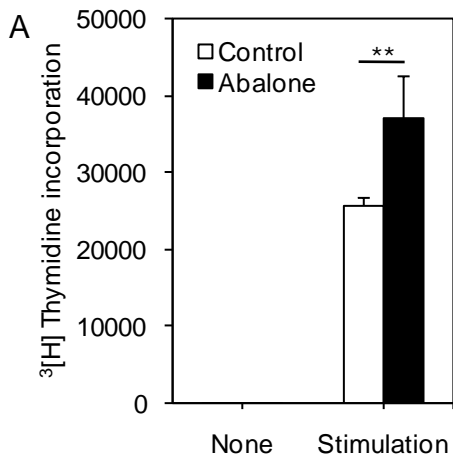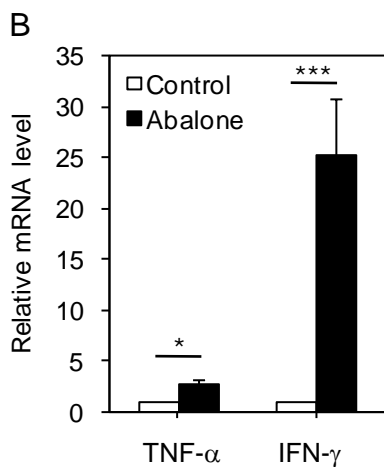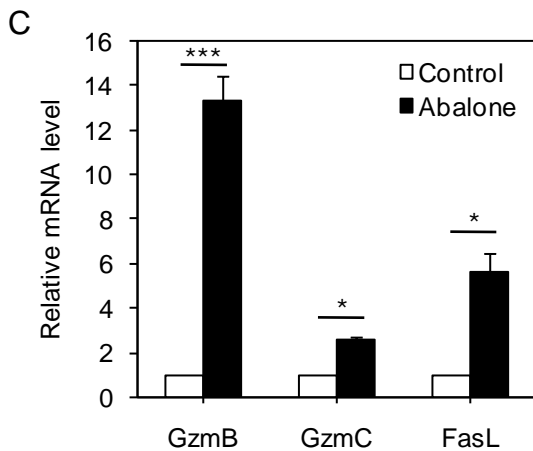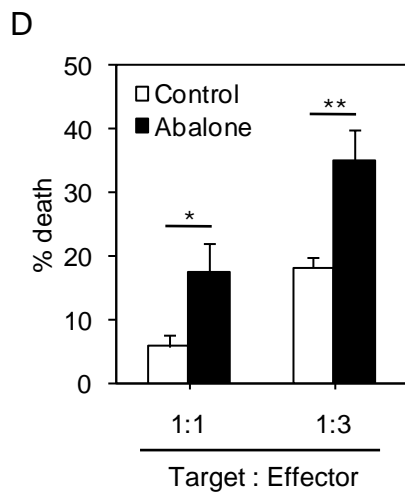

Supplement: MOESM7 [file 9519466]
